# Supplementary material for: The Effect of Integration of Self-Management Web Platforms on Health Status in Chronic Obstructive Pulmonary Disease Management in Primary Care (e-Vita Study): Interrupted Time Series Design
Source: PubMed Central journal article supplement (PMC5577456; doi:10.2196/jmir.8262), 2017-08-16
Supplement: jmir_v19i8e291_app3.pdf [file jmir_v19i8e291_app3.pdf]

## Research and reporting methodology

### Revised Standards for QUality Improvement Reporting Excellence

(SQUIRE 2.0) publication guidelines

| Text section and item name                                                                                                                                                                                                                           | Page                                                            |
|------------------------------------------------------------------------------------------------------------------------------------------------------------------------------------------------------------------------------------------------------|-----------------------------------------------------------------|
|                                                                                                                                                                                                                                                      | info is located                                                 |
| <b>Title and abstract</b>                                                                                                                                                                                                                            |                                                                 |
| <b>1. Title</b>                                                                                                                                                                                                                                      |                                                                 |
| Indicate that the manuscript concerns an initiative to improve healthcare (broadly defined to include the quality, safety, effectiveness, patient-centredness, timeliness, cost, efficiency and equity of healthcare).                               | Page 1                                                          |
| <b>2. Abstract</b>                                                                                                                                                                                                                                   |                                                                 |
| a. Provide adequate information to aid in searching and indexing.                                                                                                                                                                                    | Page 2<br>(Abstract/Keywords/<br>Article summary)               |
| b. Summarise all key information from various sections of the text using the abstract format of the intended publication or a structured summary such as: background, local problem, methods, interventions, results, conclusions.                   | Page 2<br>(Abstract/Article<br>summary/What this<br>paper adds) |
| <b>Introduction: Why did you start?</b>                                                                                                                                                                                                              |                                                                 |
| <b>3. Problem description</b> - Nature and significance of the local problem.                                                                                                                                                                        | Page 4<br>(Introduction)                                        |
| <b>4. Available knowledge</b> - Summary of what is currently known about the problem, including relevant previous studies.                                                                                                                           | Page 4<br>(Introduction)                                        |
| <b>5. Rationale</b> - Informal or formal frameworks, models, concepts and/or theories used to explain the problem, any reasons or assumptions that were used to develop the intervention(s) and reasons why the intervention(s) was expected to work | Page 4/5<br>(Introduction)                                      |
| <b>6. Specific aims</b> - Purpose of the project and of this report.                                                                                                                                                                                 | Page 5<br>(Introduction)                                        |
| <b>Methods: What did you do?</b>                                                                                                                                                                                                                     |                                                                 |
| <b>7. Context</b> - Contextual elements considered important at the outset of introducing the intervention(s).                                                                                                                                       | Page 5 (Study<br>design)                                        |
| <b>8. Intervention(s)</b>                                                                                                                                                                                                                            |                                                                 |
| a. Description of the intervention(s) in sufficient detail that others could reproduce it.                                                                                                                                                           | Page 6/7<br>(Intervention)                                      |
| b. Specifics of the team involved in the work.                                                                                                                                                                                                       | Page 6/7<br>(Intervention)                                      |
| <b>9. Study of the intervention(s)</b>                                                                                                                                                                                                               |                                                                 |
| a. Approach chosen for assessing the impact of the intervention(s).                                                                                                                                                                                  | Page 5/6 (Study<br>design)                                      |
| b. Approach used to establish whether the observed outcomes were due to the intervention(s).                                                                                                                                                         | Page 7/8 (Statistical<br>methods)                               |
| <b>10. Measures</b>                                                                                                                                                                                                                                  |                                                                 |
| a. Measures chosen for studying processes and outcomes of the intervention(s), including rationale for choosing them, their operational definitions and their validity and reliability.                                                              | Page 7 (Outcome<br>measures)                                    |

|                                                                                                                                                                                                                              |                                                                                                                                                                                  |
|------------------------------------------------------------------------------------------------------------------------------------------------------------------------------------------------------------------------------|----------------------------------------------------------------------------------------------------------------------------------------------------------------------------------|
| b. Description of the approach to the ongoing assessment of contextual elements that contributed to the success, failure, efficiency and cost.                                                                               | Page 7 (Outcome measures)                                                                                                                                                        |
| c. Methods employed for assessing completeness and accuracy of data.                                                                                                                                                         | Page 7/8 (Statistical methods)                                                                                                                                                   |
| <b>11. Analysis</b>                                                                                                                                                                                                          |                                                                                                                                                                                  |
| a. Qualitative and quantitative methods used to draw inferences from the data.                                                                                                                                               | Page 7/8 (Statistical methods)                                                                                                                                                   |
| b. Methods for understanding variation within the data, including the effects of time as a variable.                                                                                                                         | Page 7/8 (Statistical methods)                                                                                                                                                   |
| <b>12. Ethical considerations</b> - Ethical aspects of implementing and studying the intervention(s) and how they were addressed, including, but not limited to, formal ethics review and potential conflict(s) of interest. | Page 14 (Ethics approval and consent to participate / Competing interests)                                                                                                       |
|                                                                                                                                                                                                                              |                                                                                                                                                                                  |
| <b>Results: What did you find?</b>                                                                                                                                                                                           |                                                                                                                                                                                  |
| <b>13. Results</b>                                                                                                                                                                                                           |                                                                                                                                                                                  |
| a. Initial steps of the intervention(s) and their evolution over time (eg, time-line diagram, flow chart or table), including modifications made to the intervention during the project.                                     | Page 8/9 (Results)                                                                                                                                                               |
| b. Details of the process measures and outcomes.                                                                                                                                                                             | Page 9 (Baseline characteristics of COPD patients/ Health status before/after intervention in the total group, in groups with/without personal assistance, and in the subgroups) |
| c. Contextual elements that interacted with the intervention(s).                                                                                                                                                             | Page 9 (Baseline characteristics of COPD patients/ Health status before/after intervention in the total group, in groups with/without personal assistance, and in the subgroups) |
| d. Observed associations between outcomes, interventions and relevant contextual elements.                                                                                                                                   | Page 9 (Health status before/after intervention in the total group, in groups with/without personal assistance,                                                                  |

|                                                                                                                                                |                                              |
|------------------------------------------------------------------------------------------------------------------------------------------------|----------------------------------------------|
|                                                                                                                                                | and in the subgroups)                        |
| e. Unintended consequences such as unexpected benefits, problems, failures or costs associated with the intervention(s).                       | Page 10 (Strengths and limitations)          |
| f. Details about missing data.                                                                                                                 | Page 8/9 (Results)                           |
|                                                                                                                                                |                                              |
| <b>Discussion: What does it mean?</b>                                                                                                          |                                              |
| <b>14. Summary</b>                                                                                                                             |                                              |
| a. Key findings, including relevance to the rationale and specific aims.                                                                       | Page 10 (Discussion)                         |
| b. Particular strengths of the project.                                                                                                        | Page 10 (Strengths and limitations)          |
|                                                                                                                                                |                                              |
| <b>15. Interpretation</b>                                                                                                                      |                                              |
| a. Nature of the association between the intervention(s) and the outcomes.                                                                     | Page 11/12 (Interpretation of findings)      |
| b. Comparison of results with findings from other publications.                                                                                | Page 11/12 (Interpretation of findings)      |
| c. Impact of the project on people and systems.                                                                                                | Page 11/12 (Interpretation of findings)      |
| d. Reasons for any differences between observed and anticipated outcomes, including the influence of context.                                  | Page 11/12 (Interpretation of findings)      |
| e. Costs and strategic trade-offs, including opportunity costs.                                                                                | N/A; this manuscript does not look at costs. |
|                                                                                                                                                |                                              |
| <b>16. Limitations</b>                                                                                                                         |                                              |
| a. Limits to the generalisability of the work.                                                                                                 | Page 10/11 (Strengths and limitations)       |
| b. Factors that might have limited internal validity such as confounding, bias or imprecision in the design, methods, measurement or analysis. | Page 10/11 (Strengths and limitations)       |
| c. Efforts made to minimise and adjust for limitations.                                                                                        | Page 10/11 (Strengths and limitations)       |
|                                                                                                                                                |                                              |
| <b>Conclusions</b>                                                                                                                             |                                              |
| a. Usefulness of the work.                                                                                                                     | Page 11/12 (Interpretation of findings)      |
| b. Sustainability.                                                                                                                             | Page 11/12 (Interpretation of findings)      |
| c. Potential for spread to other contexts.                                                                                                     | Page 11/12 (Interpretation of                |

|                                                                                                                                                                          |                                            |
|--------------------------------------------------------------------------------------------------------------------------------------------------------------------------|--------------------------------------------|
|                                                                                                                                                                          | findings)                                  |
| d. Implications for practice and for further study in the field.                                                                                                         | Page 11/12<br>(Interpretation of findings) |
| e. Suggested next steps.                                                                                                                                                 | Page 11/12<br>(Interpretation of findings) |
|                                                                                                                                                                          |                                            |
| <b>Other information</b>                                                                                                                                                 |                                            |
| 18. <b>Funding</b> - Sources of funding that supported this work. Role, if any, of the funding organisation in the design, implementation, interpretation and reporting. | Page 14 (Funding)                          |
|                                                                                                                                                                          |                                            |

Ogrinc G, et al. *BMJ Qual Saf* 2015;0:1–7. doi:10.1136/bmjqs-2015-004411
